1           **Family-specific genotype arrays increase the accuracy of pedigree based**  
2                           **imputation at very low marker densities**

3                           Andrew Whalen, Gregor Gorjanc, and John M Hickey

4

5                   The Roslin Institute and Royal (Dick) School of Veterinary Studies, The University of

6                           Edinburgh, Midlothian, Scotland, UK

7

8  
9  
10  
11  
12  
13  
14  
15  
16  
17  
18  
19  
20  
21  
22  
23  
24

### Abstract

In this paper we evaluate the performance of using a family-specific low-density genotype arrays to increase the accuracy of pedigree based imputation. Genotype imputation is a widely used tool that decreases the costs of genotyping a population by genotyping the majority of individuals using a low-density array and using statistical regularities between the low-density and high-density individuals to fill in the missing genotypes. Previous work on population based imputation has found that it is possible to increase the accuracy of imputation by maximizing the number of informative markers on an array. In the context of pedigree based imputation, where the informativeness of a marker depends only on the genotypes of an individual's parents, it may be beneficial to select the markers on each low-density array on a family-by-family basis. In this paper we examined four family-specific low-density marker selection strategies, and evaluated their performance in the context of a real pig breeding dataset. We found that family-specific or sire-specific arrays could increase imputation accuracy by 0.11 at 1 marker per chromosome, by 0.027 at 25 markers per chromosome and by 0.007 at 100 markers per chromosome. These results suggest that there may be a room to use family-specific genotyping for very-low-density arrays particularly if a given sire or sire-dam pairing have a large number of offspring.

## 25 **Introduction**

26           In this paper we evaluate the performance of using family-specific low-density genotyping  
27 arrays for pedigree based imputation. The use of genomic information in livestock breeding has  
28 risen substantially over the past decade, and has led to an increase in the accuracy of selection,  
29 particularly on traits with low heritability (Van Eenennaam et al., 2014), decreased the  
30 generational interval for some species (notably cattle; Wiggans et al., 2017), and increased the rate  
31 of genetic gain (Knol et al., 2016). Many of these gains have been made possible due to the use of  
32 low-cost genotypes obtained through genotype imputation. In the context of an animal or plant  
33 breeding program, genotype imputation allows most of the individuals in the population to be  
34 genotyped with a low-cost, low-density genotype array, while only a small number of individuals  
35 (e.g., the sires and top dams) are genotyped with a high-density array. The markers on the low-  
36 density array are used to identify shared haplotypes between low-density and high-density  
37 individuals. The shared haplotype segments are then used to fill-in missing genotypes (Li and  
38 Stephens, 2003).

39           High imputation accuracy is key for maximizing the rate of genetic gain in a population;  
40 low imputation accuracy decreases genomic prediction accuracy, which in turn decreases the  
41 response to selection. One of the primary factors that influences imputation accuracy is the total  
42 number of markers on a low-density genotyping array. If there are too few markers then it may be  
43 challenging to correctly identify the shared haplotypes between low-density and high-density  
44 individuals. Having more markers increases the specificity of detecting shared haplotypes.  
45 However, increasing the number of low-density markers also increases the cost, potentially  
46 limiting the number of individuals genotyped. An alternative way to increase accuracy is to keep

47 the total number of markers constant, but choose the markers to be as informative as possible  
48 (Aliloo et al., 2018; Boichard et al., 2012; Wu et al., 2016).

49 Past work on population based imputation has found that selecting markers that have high  
50 minor allele frequency, are evenly spaced throughout the chromosome (Wu et al., 2016), or covary  
51 strongly with other markers can improve imputation accuracy (Aliloo et al., 2018). These three  
52 factors allow a population based imputation method to distinguish between high-density reference  
53 haplotypes and find the specific reference haplotype that the low-density individual carries. For  
54 example, markers with high minor allele frequency are likely to segregate between haplotypes,  
55 allowing similar haplotypes to be distinguished. In contrast, markers with a low minor allele  
56 frequency may be fixed in most of the haplotypes in the population and so provide limited  
57 information.

58 We can also search for informative markers in the context of pedigree based imputation.  
59 Unlike for population based imputation methods, where we need to identify which haplotype an  
60 individual carries from all of the haplotypes in the population, in pedigree based imputation where  
61 an individual is imputed based on the genotypes of their parents, we only need to identify which  
62 parental haplotypes the individual inherited at each marker. This reduces the number of haplotypes  
63 that need to be considered from hundreds or thousands to just four (for diploid species).  
64 Informative markers are those that allow us to distinguish between the parental haplotypes. If the  
65 parents have high-density genotypes (potentially by having been imputed themselves) and are  
66 phased then the informative markers will be the markers that are heterozygous in the parents. To  
67 illustrate this, suppose there is a biallelic marker where both parents are genotyped and phased. If  
68 sire is AB and the dam is BB, then the marker is informative for distinguishing sire haplotypes.  
69 The resulting child will either be AB or BB. If the child is AB we know that the child inherited the

70 A allele from the sire and since the sire is phased we know which haplotype the child inherited at  
71 that marker. Alternatively if the child is BB, we know it inherited the B allele from the sire and  
72 the corresponding haplotype. If both parents are heterozygous at a marker (AB and AB), then the  
73 marker will be informative for both parents in half of the time, i.e. when the child is either AA or  
74 BB. If the child is AB the marker will not be informative since we cannot determine the parent of  
75 origin for each allele. We illustrate these conditions in Figure 1.

76 The fact that the marker informativeness for pedigree based imputation is based only on  
77 the genotypes of the sire and dam of an individual suggests selecting the markers on the low-  
78 density array on a family-by-family basis, by targeting markers that are heterozygous in one, or  
79 both parents. In this paper we use simulation to evaluate the performance of four family-specific  
80 low-density marker selection strategies and three population based strategies. In each simulations  
81 we used a marker selection strategy to construct a series of low-density arrays. These arrays were  
82 then used to mask high-density genotype data taken from a commercial pig population. We used  
83 multi-locus iterative peeling (Whalen et al., 2017) to re-impute each individual to high-density.  
84 We found that although family-specific genotyping arrays greatly increased the accuracy of  
85 imputation at very low marker densities (5-10% gains at < 25 markers per chromosome) but that  
86 the gains at low-density arrays with more markers were small (<1%, at >100 markers per  
87 chromosome).

## 88 **Materials and Methods**

### 89 **Genetic data**

90 In this study, we used genotypes for 1,000 focal individuals and their ancestors from a large  
91 commercial pig breeding program. The focal individuals were selected to have been genotyped on  
92 a high-density array (~50k markers across 18 chromosomes), and to have had 5 generations of

93 (potentially low-density) genotyped ancestors. In total, we extracted the genotypes for 2,405  
94 animals (1,000 focal individuals and 1,405 ancestors). We have then performed several simulations  
95 where the genotypes of the focal individuals were masked according to a low-density marker  
96 selection strategy (explained below) and imputed using AlphaPeel. AlphaPeel is a pedigree based  
97 imputation method based on multi-locus peeling (Whalen et al., 2017;  
98 <https://alphagenes.roslin.ed.ac.uk/wp/software/alphapeel/>). We have run AlphaPeel with default  
99 parameters.

### 100 **Marker selection strategies**

101 We evaluated two sets of marker selection strategies where the markers on the low-density  
102 array were either optimized for the whole population, or for a specific family. For all methods, we  
103 split the chromosome into  $k$  bins, where  $k$  is the number of low-density markers, and used a marker  
104 selection strategy to select a marker from each bin. For each marker selection strategy, we varied  
105 the number of low-density markers per chromosome between 1 and 700 in 16 increments, using  
106 either 1, 2, 3, 5, 10, 15, 25, 50, 100, 150, 200, 300, 400, 500, 600, or 700 markers.

107 We evaluated three population based marker selection strategies. We selected either the  
108 middle marker from each bin (*midpoint*), the marker in the bin that had the highest minor allele  
109 frequency (*maf*), or the marker that was simultaneously central and had a high minor allele  
110 frequency (*combined*). The combined centrality and minor allele frequency was based on the  
111 method of Wu et al. (2016). For each marker we calculated a score:

$$112 \quad score_i = -(1 - d_i)(p_i \log_2(p_i) + (1 - p_i) \log_2(1 - p_i)),$$

113 where  $d_i$  is the distance (in number of markers) between the marker and the center of the bin, and  
114  $p_i$  is the minor allele frequency for marker  $i$ . The term  $(1 - d_i)$  gives higher weight to markers that  
115 are close to the center of the bin. The term  $(p_i \log_2(p_i) + (1 - p_i) \log_2(1 - p_i))$  is the Shannon

116 information content of the marker based on the minor allele frequency and is highest for markers  
117 with minor allele frequency close to 0.5 (Wu et al. 2016). Unlike Wu et al. (2016) we did not  
118 perform a global optimization of the location of each markers, but instead selected the marker for  
119 each bin independently.

120 Previous work has found that selecting two markers from the first and last bins on the  
121 chromosome can improve accuracy (Boichard et al., 2012) due to the higher-than normal  
122 recombination rate at the ends of the chromosome. Due to the small number of markers used in  
123 our study (in some cases, only 1 marker was used) we only selected a single marker from each bin,  
124 even for the first and last bins.

125 We evaluated four family-specific marker selection strategies. We selected the marker  
126 closest to the center of the bin that was either heterozygous in both parents (*Het/Het*), heterozygous  
127 in one parent and homozygous in the other (*Het/Hom*), heterozygous in at least one parent  
128 (*Het/Any*), or heterozygous in the sire (*Het/Sire*). In the *Het/Hom* condition we used  $\frac{k}{2}$  bins and  
129 separately selected markers in each bin that were informative for the sire or the dam (if the number  
130 of markers was odd, the sire received  $\frac{k+1}{2}$  bins, and the dam received  $\frac{k-1}{2}$  bins). If a bin did not  
131 contain an acceptable marker for the family-specific strategy, we used the *combined* population  
132 strategy to select the marker for that bin. This occurred primarily in the *Het/Het* condition when  
133 there were no markers that were heterozygous in both parents, or when the number of low-density  
134 markers was large. In all family-specific strategies, we restricted the pool of potential markers to  
135 markers that were genotyped in the real dataset (i.e., not missing) in the sire, dam, and offspring.

### 136 **Imputation accuracy measurement**

137 Imputation accuracy was measured as the correlation between an individual's imputed  
138 genotype and their true genotype, corrected for their parent average genotype:

139 
$$accuracy = cor(G_{imputed} - G_{parent\_average}, G_{true} - G_{parent\_average}).$$

140 This measure of imputation accuracy is designed specifically for pedigree based imputation. It is  
141 0 if no genotype information is available on a focal individual (leading the individual to be imputed  
142 as the parent average genotype), and is 1 if the individual is imputed perfectly. The goal of this  
143 metric is to assess the accuracy of imputing within-family (Mendelian sampling) genotype  
144 variation. In simulations we have found a close relationship between this measure of imputation  
145 accuracy and the accuracy of the breeding value estimates. In addition, this measure does not rely  
146 on using the population minor allele frequency (as opposed to correcting for minor allele  
147 frequency, as in Calus et al., 2014), which may not be representative of the allele frequencies in  
148 specific families. In cases where the genotypes of the parents were missing in the real dataset, we  
149 used the imputed values from AlphaPeel to calculate the parent average genotype. This was  
150 primarily done to fill in spontaneous missing genotypes, and to impute dams that were genotyped  
151 at a lower density.

152 Imputation accuracies were calculated separately for each chromosome and then averaged  
153 across all 18 chromosomes.

## 154 **Results**

155 In Figure 2, we present the performance of using either a population strategy or a family-  
156 specific strategy, for both the (a) absolute imputation accuracy, or (b) imputation accuracy relative  
157 to the *combined* population strategy. We found that the *combined* strategy was the highest  
158 performing population strategy, followed by the *maf* strategy, and then by the *midpoint* strategy.  
159 The difference between the *combined* strategy and the *maf* strategy was less than 0.001 at above  
160 25 markers per chromosome. Of the family-specific strategies, we found that the *Het/Hom* strategy  
161 was the highest performing strategy, followed by the *Het/Any* strategy, and finally the *Het/Het*



162 strategy. The *Het/Sire* strategy performed better than the Het/Het strategy with fewer than 5  
163 markers, but worse with 5 or more markers. For all marker densities, the family-specific strategies  
164 outperformed the *combined* strategy.

165 The *combined* strategy gave high imputation accuracies across a range of marker densities.  
166 Imputation accuracy was 0.312 at 1 marker per chromosome (18 markers total), 0.796 at 10  
167 markers per chromosome (180 markers total), 0.903 at 25 markers per chromosome (450 markers  
168 total), 0.945 at 50 markers per chromosome (900 markers total), and 0.985 at 500 markers per  
169 chromosome (9,000 markers genome wide).

170 Using a family-specific strategy further increased imputation accuracy. When the Het/Any  
171 strategy was used, we obtained an 0.111 gain in imputation accuracy compared to the *combined*  
172 strategy at 1 marker per chromosome. This dropped to 0.058 at 10 markers per chromosome, 0.027  
173 at 25 markers per chromosome, 0.014 at 50 markers per chromosome, and 0.010 at 500 markers  
174 per chromosome. The gains for the other family-specific strategies were similar.

175 In Figure 3(a), we plot the imputation accuracy with the Het/Any strategy by chromosome,  
176 and in Figure 3(b) by chromosome length. We found that imputation accuracy decreased as the  
177 chromosome length increased, but that this difference was small even for large chromosomes. To  
178 quantify these differences in imputation accuracy, we used a linear model to measure the effect of  
179 the number of markers and chromosome length (in cM) on accuracy. Chromosome lengths were  
180 taken from Tortereau et al. (2012). The linear model fitted chromosome length as a linear covariate  
181 nested within the number of markers as a categorical variable to account for the non-linear effect  
182 that number of markers has on accuracy. We found a significant effect of chromosome length on  
183 accuracy (regression coefficients decreased from -0.0012 loss of accuracy per cM at 2 marker per

184 chromosome to 0.0001 loss of accuracy per cM at 100 marker per chromosome,  $p < 0.001$ ) and the  
185 interaction between the number of markers and chromosome length ( $p < 0.001$ ).

## 186 **Discussion**

187 In this paper we evaluate the performance of using family-specific low-density marker  
188 selection strategies to increase the accuracy of pedigree based imputation. We found that using  
189 parental genotype information to select markers on a low-density genotype array could increase  
190 imputation accuracy, with the largest gains occurring at very low marker densities (between a 0.11  
191 and 0.05 increase in accuracy for between 1 and 25 markers per chromosome). The gains were  
192 more limited at higher marker densities (under a 0.01 increase in accuracy at more than 100  
193 markers per chromosome). In addition, we quantified the influence that chromosome length had  
194 on imputation accuracy, and found that increasing chromosome length had a near-linear impact on  
195 imputation accuracy when the number of informative markers per chromosome was held constant.  
196 In the remainder of the discussion we will highlight the performance of each family-specific  
197 marker selection strategy, compare our results to past work on optimizing the design of low-density  
198 arrays for population based imputation, and discuss the commercial viability of using family-  
199 specific genotype arrays.

200

## 201 **Performance of family-specific marker selection strategies**

202 In this paper we found that selecting the markers on a low-density genotype array based on  
203 parental information increased accuracy in all cases compared to using the same set of markers for  
204 every individual in the population. We evaluated four marker selection strategies, and found that  
205 selecting markers that were heterozygous in one parent, and homozygous in the other (Het/Hom,  
206 Figure 1a) yielded the highest imputation accuracies. Selecting markers that were heterozygous in

207 both parents (Het/Het, Figure 1b) resulted in much lower imputation accuracies than the Het/Hom  
208 strategy, particularly at very low marker densities. This effect is caused by the lack of informative  
209 markers when low-density individuals have heterozygous genotypes in the Het/Het condition  
210 (Figure 1b).

211 In addition to the strategies presented in Figure 1, we also investigated two hybrid  
212 strategies. The first was to select markers that were heterozygous in either (Het/Any). The  
213 second was to select markers that were heterozygous in the sire (Het/Sire). We found that the  
214 Het/Any strategy performed in between the Het/Hom and Het/Het strategies, reflecting the fact  
215 that markers chosen were split between being heterozygous in one parent and homozygous in the  
216 other, and being heterozygous in both parents. We found that the Het/Sire condition performed  
217 well at a few markers per chromosome, but that the gain in imputation accuracy declined more  
218 rapidly compared to the alternative strategies. This is likely due to the Het/Sire strategy placing  
219 most of its weight on finding markers that are informative for the sire, resulting in few markers  
220 that were informative for the dam. Even so, the Het/Sire strategy outperformed all of the  
221 population strategies tested, making it a potentially useful strategy when a single sire produces a  
222 large number of offspring.

223 One of the advantages of studying family-specific marker selection strategies is that  
224 because they focus all of their genotyping efforts on informative loci, they also provide an upper  
225 bound on the performance any population-specific strategy. We found that the difference between  
226 all of the family-specific strategies and the worst performing population strategy was less than  
227 0.01 at 100 markers, suggesting that for pedigree based imputation there are limited gains for  
228 optimizing the design for low-density arrays if more than 100 markers per chromosome are used  
229 (1,800 markers in total for the 18 pig autosomal chromosomes in our study population).

230

### 231 **Comparison to population based imputation**

232       The results in this paper align closely with the previous work on optimizing low-density  
233 genotyping arrays for population based imputation. Similar to both Aliloo et al. (2018) and Wu et  
234 al. (2016), we find that the gains in imputation accuracy for an optimized array were highest at  
235 low marker densities and diminished at higher densities. We were also able to replicate the primary  
236 finding of Wu et al. (2016), that simultaneously optimizing the low-density markers for both high  
237 minor allele frequency and even spacing improved imputation accuracy particularly at low-  
238 densities.

239       Consistent with past work on population and pedigree based imputation (Antolín et al.,  
240 2017) we found that the accuracy of pedigree based imputation was higher than that of population  
241 based imputation at similar marker densities. This is expected because population based imputation  
242 has to compare an individual's low-density genotype to all of the population haplotypes, while  
243 pedigree based imputation has to match it to the four parental haplotypes. When the number of  
244 low-density markers is small it is hard to distinguish among population haplotypes, but much easier  
245 to distinguish among parental haplotypes. When the number of markers increases, distinguishing  
246 population haplotypes becomes easier. Therefore, in the context of optimizing the low-density  
247 arrays, family-specific strategies will be relevant only at low marker densities. For example, Aliloo  
248 et al. (2018) obtained a gain in imputation accuracy of 0.10 at ~125 markers per chromosome using  
249 an optimized set of markers and a population based imputation algorithm (absolute imputation  
250 accuracy rose from 0.69 to 0.79). In contrast, we observed an accuracy of 0.97 at 100 markers per  
251 chromosome with pedigree based imputation, obtained a gain in imputation accuracy of 0.10 at 3  
252 markers per chromosome (going from 0.55 to 0.65 accuracy) in the Het/Any condition.

253

254 **Commercial feasibility of family based imputation**

255       The primary question of using family-specific genotype arrays revolves around the cost  
256 and the complexity of deploying such arrays in the context of a genetic improvement program.  
257 There are two primary issues: First, in order for a family-specific array to be beneficial, the density  
258 of the array needs to be low. Second, the use of a family-specific array may require the construction  
259 of a large number of arrays, which may be prohibitively expensive. We discuss both of these issues  
260 in more detail below.

261       On the question of marker densities, we find that in order for a family-specific genotype  
262 array to be beneficial, the underlying marker density has to be much smaller than what is traditional  
263 used in an animal improvement program (<25 markers per chromosome), and will result in lower  
264 absolute values of imputation accuracy than a traditional low or medium density array. This limits  
265 the use case for family-specific arrays into the situation where having imperfect genetic  
266 information is acceptable, i.e., to cases where the accuracy of selection can be low, or when  
267 selection decisions are not directly made on the genotyped individual. Such situations might  
268 include genotyping individuals in a non-nucleus environment to establish flow of phenotypic  
269 information to individuals in the nucleus, or performing genetic improvement in breeding  
270 programs where very low-density arrays are used to genotype a very large number of offspring.  
271 This might have potential in aquaculture (Lillehammer et al., 2013; Tsai et al., 2017) and crop  
272 breeding (Gonen et al., 2018; Jacobson et al., 2015).

273       On the question of the number of arrays, because the family-specific genotype arrays  
274 depend on the genotypes of both the sire and the dam, the number of different arrays individuals  
275 in the population need to be genotyped at may be large. This will be particularly the case when a

276 single dam has a limited number of offspring (most notably in cattle and small ruminants, but also  
277 in pigs). In these cases it may be possible to reduce the number of arrays needed by using a sire-  
278 specific genotype array. Alternatively, there may be situations where a single sire-dam pair may  
279 produce a large number of offspring as is the case in aquaculture and crop breeding, or where a  
280 more flexible genotyping method could be deployed (Thomson et al., 2012).

## 281 **Conclusion**

282 Overall this paper evaluates the utility of family information to select markers on a low-  
283 density array. Although we find minimal gains at the densities currently used in modern breeding  
284 programs (over 100 markers per chromosome), we find high increases in accuracy at very low  
285 marker densities (between 1-25 markers per chromosome), and may be particularly useful when  
286 expanding genotyping efforts to individuals that are not traditionally genotyped.

287

## 288 **Acknowledgements**

289 The authors acknowledge the financial support from the BBSRC ISPG to The Roslin  
290 Institute BB/J004235/1, from Genus PLC, and from Grant Nos. BB/M009254/1, BB/L020726/1,  
291 BB/N004736/1, BB/N004728/1, BB/L020467/1, BB/N006178/1 and Medical Research Council  
292 (MRC) Grant No. MR/M000370/1. This work has made use of the resources provided by the  
293 Edinburgh Compute and Data Facility (ECDF) (<http://www.ecdf.ed.ac.uk>).

294

## 295 **References**

296 Aliloo, H., Mrode, R., Okeyo, A.M., Ojango, J., Dessie, T., Rege, J.E.O., Goddard, M.E.,  
297 and Gibson, J.P. (2018). Optimal design of low-density marker panels for genotype imputation.  
298 Proc. Fo World Congr. Genet. Appl. Livest. Prod.

- 299           Browning, S.R., and Browning, B.L. (2007). Rapid and accurate haplotype phasing and  
300 missing-data inference for whole-genome association studies by use of localized haplotype  
301 clustering. *Am. J. Hum. Genet.* *81*, 1084–1097.
- 302           Das, S., Forer, L., Schönherr, S., Sidore, C., Locke, A.E., Kwong, A., Vrieze, S.I., Chew,  
303 E.Y., Levy, S., and McGue, M. (2016). Next-generation genotype imputation service and  
304 methods. *Nat. Genet.* *48*, 1284–1287.
- 305           Hickey, J.M., Kinghorn, B.P., Tier, B., Wilson, J.F., Dunstan, N., and Werf, J.H. van der  
306 (2011). A combined long-range phasing and long haplotype imputation method to impute phase  
307 for SNP genotypes. *Genet. Sel. Evol.* *43*, 12.
- 308           Knol, E.F., Nielsen, B., and Knap, P.W. (2016). Genomic selection in commercial pig  
309 breeding. *Anim. Front.* *6*, 15.
- 310           Meuwissen, T., and Goddard, M. (2010). The Use of Family Relationships and Linkage  
311 Disequilibrium to Impute Phase and Missing Genotypes in Up to Whole-Genome Sequence  
312 Density Genotypic Data. *Genetics* *185*, 1441–1449.
- 313           Sargolzaei, M., Chesnais, J.P., and Schenkel, F.S. (2011). FImpute - An efficient  
314 imputation algorithm for dairy cattle populations. *J. Dairy Sci.* *94 (E-Suppl. 1)*, 421.
- 315           Van Eenennaam, A.L., Weigel, K.A., Young, A.E., Cleveland, M.A., and Dekkers,  
316 J.C.M. (2014). Applied Animal Genomics: Results from the Field. *Annu. Rev. Anim. Biosci.* *2*,  
317 105–139.
- 318           Whalen, A., Ros-Freixedes, R., Wilson, D.L., Gorjanc, G., and Hickey, J.M. (2017).  
319 Hybrid peeling for fast and accurate calling, phasing, and imputation with sequence data of any  
320 coverage in pedigrees. *bioRxiv*.
- 321           Wiggans, G.R., Cole, J.B., Hubbard, S.M., and Sonstegard, T.S. (2017). Genomic

322 Selection in Dairy Cattle: The USDA Experience. *Annu. Rev. Anim. Biosci.* 5, 309–327.

323 Wu, X.-L., Xu, J., Feng, G., Wiggans, G.R., Taylor, J.F., He, J., Qian, C., Qiu, J.,

324 Simpson, B., Walker, J., et al. (2016). Optimal Design of Low-Density SNP Arrays for Genomic

325 Prediction: Algorithm and Applications. *PLOS ONE* 11, e0161719.

326



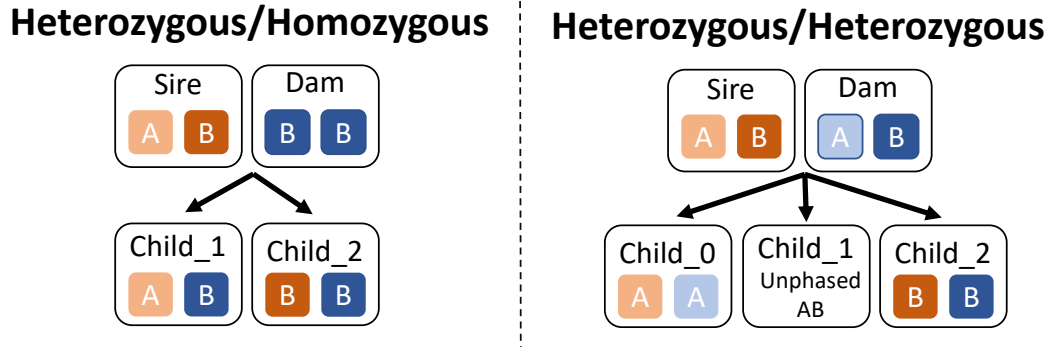

327

328 Figure 1. A graphical representation of informative markers for pedigree based

329 imputation.

330

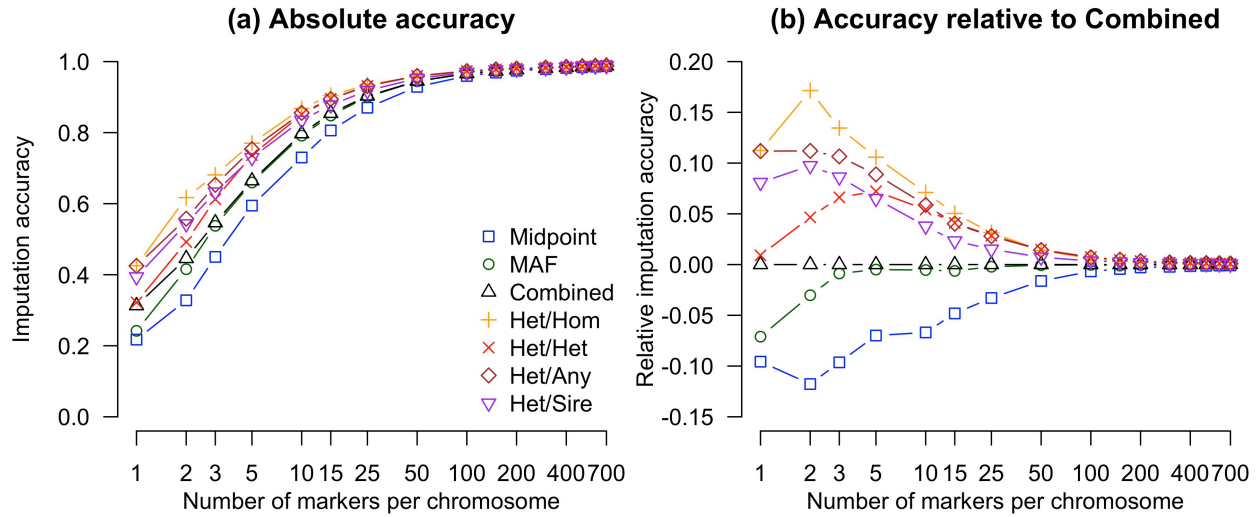

331

332

Figure 2. Imputation accuracy as a function of the number of markers per chromosome

333

and the marker selection strategy. Panel (a) provides the absolute imputation accuracy (measured

334

as correlation between the true and imputed genotypes of an individuals corrected for parent

335

average genotype), while panel (b) provides comparison relative to the *combined* strategy.

336

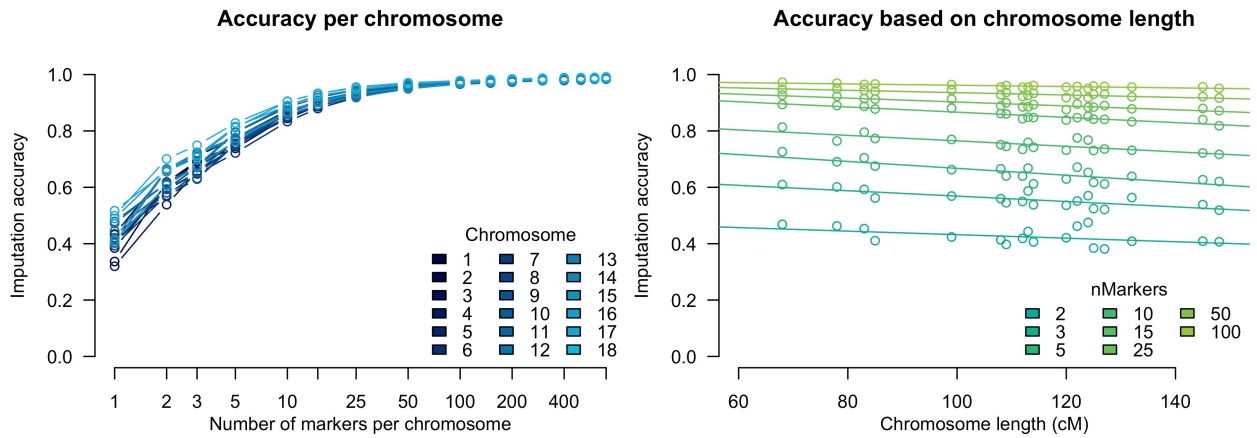

337

338

Figure 3. Imputation accuracy by (a) chromosome and (b) chromosome length. In both

339

panels the Het/Any strategy was used to select the markers on the low-density arrays.

340
